# Supplementary material for: Study on Proteomics-Based Aortic Dissection Molecular Markers Using iTRAQ Combined With Label Free Techniques
Source: Front Physiol. 2022 Jul 15;13:862732. doi: 10.3389/fphys.2022.862732 (PMC9335284; doi:10.3389/fphys.2022.862732)
Supplement: Supplementary file 4 [file DataSheet2.xlsx]

## Sheet: Sheet1
name	ID	group	MMRN1	FBN1	FGL1	LUMICAN	MMP9	MMP2	PI16	VWF	PF4	HP	DM	SMOKE	AGE	SEX	HEIGHT	WEIGHT	HGB	PLT	RBC	WBC	ALT	AST	CK	CKMB	SCR	INR	APTT	FIB	BMI
甄广强	1	1	2787.47	651.33	75766.1	216930	412.25	242.86	159.08	2022.73	1.24392e+06	1	2	2	65	1	175	100	140	157	4.68	7		16	95	7.8		0.99	29.7	4.24	32.65
王建华	2	1			80224.1	399939	832.63		361			1	2	2	46	1	169	80	141	118	4.77	24.88	68	65	320	11.9	230.4	1.14	39.1	6.76	28.01
刘秋清	3	1			37754	332687	386.4		282.87			1	2	1	40	1	172	78	149	309	5.3	10.58	26	19	45	4.4	329.58	0.99	42.7	7.35	26.37
庄陆生	4	1		640.2	90297.6	236283	319.12	277.57	174.32	2032.56	440047	1	2	1	62	1	178	63	129	132	3.92	12.97	11	19	209	16.4	79.4	1.14	40	1.94	19.88
李荣济	5	1	1608.06	562.22	85164.9	258782	713.67	261.21	128.87	4075.37	536445	1	2	1	80	1	168	65	119	443	3.69	19.07	15	21	36	5.3	93.9	0.97	43.7	8.52	23.03
陈桂荣	6	1	511.95	2017.63	81082.5	219181	133.67	244.52	200.58	1220.28	483326	1	2	2	65	1	167	70	132	146	4.31	13.41	17	15	102	5.6	109.16	1.11	35.5	3.75	25.1
陈少燕	7	1	1106.55	2817.97	40812.2	215966	185.34	195.03	157.29	1285.21	40788.7	1	2	2	44	2	162	67	130	320	4.26	12.86	22	18	88	6.5	80.9	1	34.3	3.4	25.53
邓光玲	8	1	1254.46	2264.34	36117.9	209864	385.52	202.4	200	2227.59	109809	1	2	1	65	1	171	75	151	153	4.86	13.47	14	16	69	9.4	84.99	1.11	37.4	2.01	25.65
刘伟	9	1	2114.1	473.34	42474.9	189987	284.52	471.71	145.24	2587.12	501076	1	2	1	59	1	160	64	148	217	4.73	10.3	33	88	767	65.4	115.08	1.18	39	4.1	25
姜泮峰	11	1			37972.9	399939	832.63		189.99			1	2	1	39	1	170	85	149	186	4.41	9.89	28	42	268	35.2	125.75	1.13	33.4	1.32	29.41
何玉要	12	1			28521.2	332687	386.4		268.49			2	2	2	43	1	172	87.5	138	206	4.9	9.71		13	68	6.3	111.36	1.1	49.6	6.04	29.58
罗进东	13	1	1314.35	1140.09	17627	149743	54.8	158.53	282.87	1903.05	905718	1	2	1	51	1	170	78	159	202	5.02	8.71	13	22	147	8	96.97	1.03	38.5	4.1	26.99
陈灼通	15	1	2787.47	569.65	73828.3	206656	91.5	342.12	135.99	2894.05	25996.5	1	1	1	80	1	167	59	82	79	2.41	4.18		32	91	26.5	105.2	1.09	34.5	3.12	21.16
谢义新	16	1	1314.35	715.56	77893.5	223043	173.57	219.67	175.13	9123.74	16875.5	1	2	1	62	1	170	64	149	157	4.79	17.32	13	18	69	11.3	153.73	0.99	34	3.47	22.15
谢崇明	17	1	4230.93	433.6	133244	300673	475	211.84	177.02	5473.47	873194	1	2	1	53	1	168	72	145	121	4.62	10.58	22	26	125	8.7	193.9	1.08	37.6	1.77	25.51
朱少波	18	1	1038.88	892.12	63416.3	198640	110.11	233.72	130.99	611.06	46162.3	1	2	1	60	1	168	70	114	198	3.62	7.28	16	14	58	10.9	67.65	0.98	36	7.17	24.8
吴静雄	19	1	2638.75	1029.56	109372	157514	194.49	155.31	129.11	3088.95	174333	1	2	1	48	1	164	75	131	353	4.56	12.04	51	25	47	8.6	83.11				27.89
江值生	20	1	3081.24	1663.75	107997	215645	296.56	264.56	148.47		94232.3	1	2	1	65	1	171	55	126	176	4.24	13.44	9	26	479	9.6	86.45	1.31	37.2	1.84	18.81
俞福成	21	1	4570.55	1279.55	107743	211148	266.91	232.89	165.83	1478.16	21297.3	1	2	2	56	1	173	82	143	130	4.63	16.27	19	23	140	8.8	93.67	1.58	53	0.81	27.4
谢柏壮	22	1			26555.5	150685	832.63		232.97			1	2	1	44	1	169	61	133	223	4.56	11.2		40	59	4.8	206.08	1.21	44.3	8.96	21.36
秦红锦	23	1			28341.7	426284	386.4		238.7			1	2	2	43	2	170	70	125	269	4.18	11.96					57.26	1.04	39.7	7.6	24.22
孔繁梅	26	1	1625.26	1186.08	34106.2	153632	100.51	369.24	203.8	2032.56	963557	1	2	2	51	2	155	43.5	130	187	4.03	4.95		30	101	9.8	71.95	1.17	37.2	2.35	18.11
张春纺	27	1	3732.21	1013.63	113479	176836	176.24	184.84	121.2	1167.97	88907.8	1	2	1	62	1	165	60	153	173	5.01	10.66		34	198	14.2	194.37	1.02	43.8	3.5	22.04
阮灶群	28	1	1847.55	844.15	55727.7	158483	45.76	175.5	128.4	3737.21	368249	1	2	2	45	2	153	52	87	277	5.04	8.97	19	20	62	10.9	57.2	1.21	38.6	8.5	22.21
陈彩勤	30	1	3697.65	1278.33	23167.4	181971	76.64	276.72	183.03	39162.7	166307	1	2	2	61	2	155	50	127	182	4.1	8.25	15	19	144	10.5		1.03	35.9	4.42	20.81
徐元武	31	1	3013.55	1003.83	92139.6	190308	202.62	168.21	139.13	1075.15	305991	2	2	1	60	1	178	75	132	211	4.23	9.92	71	37	32	6.8	86.6				23.67
朱炳森	32	1	2651.83	786.28	158246	281346	632.8	247.02	130.99	1257.69	167937	1	2	1	63	1	167	63	122	197	5.85	18.89	58	51	47	25.4		1.27	48.5	6.36	22.59
蓝小彬	33	1	1815.67	1097.3	113367	202487	202.62	346.41	171.91	1956.48	18349.1	1	2	1	60	1	178	83	136	93	4.04	10.91	45	24	121	6.6		1.37	42.8	1.3	26.2
何汝流	35	1	6855.7	1453.72	194668	172659	297.71	418.38	200.29	3994.83	124320	1	2	1	89	1	168	56	135	167	4.41	12.09	207	298	148	23.9		1.32	41.2	2.25	19.84
杨其双	36	1	2800.23	711.45	61347	222077	532.59	200.35	127.23	1366.09	809288	2	2	1	54	1	168	55	127	133	3.85	12.06		21	224	11.7	83.35	1.22	43.3	5.03	19.49
邱存力	37	1			35206.9	244402	832.63		284.22			1	2	1	46	1	168	70	124	106	3.84	14.7		18	335	7.8	232.38	1.51	44.9	4.14	24.8
柯细鹏	38	1			15362.7	157348	386.4		286.38			1	2	1	50	1	168	80	117	157	5.32	11.5	18	24	181	9.6	84.5	1.2	37.3	3.62	28.34
林纪盛	39	1			46498.4	235181	526.35		246.77			1	2	1	39	1	170	90	155	90	4.88	13.74		26	58	9.4	58.33	1.33	45	5	31.14
林大种	42	1	1333.92	993.61	34106.2	164614	45.29	274.2	111.22		370495	1	2	2	74	1	161	62	71	232	2.38	5.05		57	40	6.5	72.31	1.25	41.5	7.38	23.92
蔡勤文	43	1			29330.5	253773	287.77		245			1	2	1	54	1	170	70	121	148	4.2	12.96	106	75	40	9.9	114.5	1.23	33.6	4.46	24.22
雷忠保	44	1			35114.3	133292	541.14		236.2			1	2	1	43	1	164	75	134	198	4.57	7.98		30	99	5.5	156.75	1.23	45.2	7.12	27.89
陈少玲	45	1	2300.48	1104.23	163211	257468	593.77	220.49	169.25	12600	277082	1	2	2	75	2	152	72	140	145	4.55	16.42	21	25	59	8.9	97.33	1.14	34.5	2.87	31.16
石安根	46	1			25815.5	257480	499.91		197.4			1	2	1	51	1	168	70	142	300	4.98	11.11	17	21	340	12.6	81.17	1.08	47.4	6.1	24.8
殷锦堂	47	1	3044.39	1189.75	123389	228201	373.49	171.04	185.52	2619.73	97766.4	1	2	2	61	1	162	65	144	209	6.89	14.92	16	21	166	8.9	127.15	1.1	40.5	2.48	24.77
张力	48	1	3364.46	1630.77	90857.6	201846	48.6	352.43	164.26	720.88	233997	1	2	2	71	2	150	62.5	128	237	4.35	6.1		26	92	15.4	83.64	1.04	36.7	4.8	27.78
江明锋	49	1			23084.4	132665	474.41		245.76			1	2	1	41	1	178	79	138	199	4.35	16.36	13	17	311	14	96.37	1.77	39.6	5.11	24.93
于与柏	50	1			35732.4	82073.1	205		177.28			1	2	1	44	1	162	65	112	665	3.56	11.95	34	16	22	6	69.33	1.17	44.3	10.48	24.77
高金凤	51	1	3852.51	1549.4	96122.5	186781	137.82	134.11	187.19	2147.43	173965	2	2	2	85	2	154	61	139	217	4.55	14.07	7	15	116	24.8	90.98	1.04	39.5	4.21	25.72
谈宝安	52	1			16864.6	112653	100.41		147.43			1	2	2	52	1	172	90	131	215	6.35	7.03	16	19	77	8.7	107.5	1.07	41.1	6.89	30.42
陈爱绿	54	1	2047.47	1888.69	27912.7	187743	133.67	244.1	230.39	3021.05	606180	1	2	2	62	2	155	51	123	140	4.14	11.95		21	213	12	67.1	1.22	38.3	2.24	21.23
黄惠莲	55	1			24431.1	238371	60.82		262.73			1	2	2	52	2	156	65	126	226	4.25	14.23	27	18	76	5.1	73.37	1.08	33	4.11	26.71
吴庚杨	56	1			24813.1	249272	64.99		259.35			1	2	2	40	1	162	65	140	123	4.65	13.51	20	25	175	9.5	201.57	1.16	38	2.53	24.77
梁华桂	58	1	2077.23	772.72	109617	199602	267.48	242.86	132.18	3160.07	209793	2	2	1	56	1	165	63.5	153	156	5.1	8.28		24	144	9.8	89.7	1	39.9	2.3	23.32
黎国光	1102	1			104925	246832	911.17		246.52			1	2	1	60	1	168	75	139	159	4.54	12.33						1.14	34.9	3.49	26.57
卢春梅	60	1			20530.3	384094	322.42		235.95			2	2	2	39	2	153	55	150	183	4.99	15.14		21	93	10.5					23.5
袁锐锋	61	1			73622.9	378712	381.71		233.96			1	2	1	37	1	172	95	152	151	5.47	20.35		78	520	38.1		1.56	48.2	0.85	32.11
苏明嫦	62	1			30928.1	416064	333.49		246.77			1	2	2	47	2	160	57.5	123	242	4.24	12.53	21	17	75	10.8	85.32	1.24	40.6	5.37	22.46
彭伟斌	63	1			23727.5	304185	230.88		227.78			2	2	2	42	1	167	95	144	185	4.87	15.27		22	72	21	98.76	1.08	35.6	3.98	34.06
余继松	64	1	2658.36	876.14	115772	197679	146.67	546.92	138.65	1113.6	415495	1	2	1	75	1	165	64	130	199	4.46	5.91		19	82	7.9	161.6	1.1	36.3	3.83	23.51
邓新娣	65	1	2286.44	985.43	140747	133766	104.54	158.12	136.24	2777.55	859690	1	2	1	56	2	170	70.5	115	703	3.87	9.64		47	21	4.2	60.15	1.16	43.3	10.39	24.39
黎惠勤	67	1	6412.4	830.62	171257	209543	637.56	234.97	209.72	1911.75	105391	1	2	1	82	1	164	73	145	165	4.34	25.38		402	66	20.1	263.15	1.5	39.7	2.47	27.14
陈敏容	69	1	5067.72	848.26	141433	161712	167.72	277.99	213.33	1585.18	209993	1	2	1	67	1	174	80	131	198	4.28	10.37		28	70	14.6	113.89	1.06	36.9	4.05	26.42
梁秋花	70	1	2244.03	957.63	87199.6	176836	338.44	213.49	222.21	908.57	25593.1	1	2	2	70	2	158	60	123	190	4.03	12.98		17	60	3.9	76.08	1.17	40.4	4.39	24.03
潘建基	71	1	3932.21	1422.18	109617	180367	122.86	370.1	243.71		32881.5	2	2	1	67	1	176	75	92	87	3.1	10.74	28	48			69.73				24.21
梁学长	73	1			34344.2	156676	257.33		155.75			1	2	1	50	1	165	75	145	303	4.64	18.76		138	4510	68	90.16	1.17	33.4	3.17	27.55
温树汉	1102	1			33331.9	155002	156.37		213.22			1	2	1	68	1	169	63	138	163	5.39	9.62	13	16	189.9	14.4	135.8	1.08	42.2	3.01	22.06
蔡蔼羡	75	1			30323.8	234386	228.08		225.09			1	2	1	52	1	172	100	141	189	4.67	10.39	49	21	66	7.5	109.6	1.15	45.9	6.88	33.8
周树强	76	1			25608.8	214123	261.64		227.54			1	2	1	46	1	162	70	168	238	5.47	14.96		17	65	8.2	102.93	1.22	40.6	8.36	26.67
胡冬月	77	1	3818.24	5478.86	111297	105229	92.49	379.62	217.59			1	2	2	70	2	155	50	111	166	3.46	5.22		17	31	13.4	87	0.98	29.6	3.06	20.81
戴世伟	78	1			40934.7	385567	475.51		275.91			1	2	2	49	1	165	78	133	166	4.1	15.23	21	19	133	8.8	137.05	1.25	42.3	1.57	28.65
胡国民	106	1			112344	302412	403.74		245.76			1	2	2	52	1	168	58	162	184	4.49	13.18	75	77	252.4	13.7	85	1.05	35.5	3.82	20.55
黄木林	1011	1			23201.2	580748	57.43		208.69			1	2	2	62	2	158	65	116	167	4.19	10.39	18	21	100.7	9.1	64	1.12	28.1	3.76	26.04
刘桂庭	1015	1			152762	219889	644.28		202.54			1	2	1	66	1	166	60	126	353	5.46	9.01	20	26			68	1.12	49.4	6.78	21.77
林文艺	1021	1			95285.3	228069	376.51		193.22			1	2	1	55	1	156	43	159	143	5.18	8.75	22	17	75.2	13.9	77	1.1	30.9	3.14	17.67
陈阮秋	1023	1			127925	215654	468.36		218.52			1	2	1	70	1	168	63	128	162	4.38	7.42	14	16	151.9	11.4	51	0.94	35.7	5.47	22.32
李光泽	1103	1			33393.1	302412	74.6		236.7			1	1	1	73	1	171	80	112	162	4	3.69	15	15	135.9	13.7	133	1.09	33.8	3.44	27.36
叶秋文	1107	1			20069	346176	182.4		262.73			1	2	11	71	1	168	70	138	223	9	4.38	13	21	263.3	14.7	76	1	33.2	3.38	24.8
梁钜添	1145	1			20530.3	409480	542.28		89.93			1	2	1	58	1	167	55	135	246	4.56	10.98	23	30	106.9	13.9	51	0.94	35.7	5.47	19.72
李汝连	1148	1			15193.2	153668	125.58		124.28			1	2	2	61	2	152	45	121	283	4.34	10.12	11	13	36.2	8.1	45.5	1.18	42.9	4.35	19.48
谭桂波	1180	1			31352.1	234783	446.55		202.54			1	2	1	75	1	160	67.5	122	306	4.16	17.72	95	58			174	1.29	40.3	8.22	26.37
列勤友	11101	1			42495.4	291435	104.47		232.72			1	2	1	70	1	158	70	115	260	3.82	15.58	19	16	120	16.3	288.3	1.11	54.6	7.33	28.04
陈锡权	11100	1			23259.6	120980	56.31		251.87			1	2	1	56	1	160	65	130	210	4.16	12.49	16	18	254.6	15.3	68	0.99	35.4	3.33	25.39
黄炬文	101	2	2819.33	973.99	31493.9	164291	63.96	231.24	187.19	7958.75	403341	1	1	1	70	1	169	61	105	318	3.03	7.18	68	70	70.2	20.1	155	1.06	45.4	5.54	21.36
曾少珍	102	2	2592.71	551.07	47307.4	171373	467.45	236.63	186.36	2147.43	719951	1	2	2	80	2	156	46	106	229	4.61	7.28	14	19	123.2	11.1	146	1	34.9	4.06	18.9
黄灼钊	103	2	2017.46	1515.92	149298	261742	1058.47	376.59	22.15	3481.94	927063	1	2	1	65	1	172	72	131	270	4.25	8.3	56	42	64.4	16.3	140	0.86	32.1	3.96	24.34
曾惠贤	104	2	2723.26	668.63	152410	152336	2939.5	199.12	61.63		997273	2	2	2	52	1	171	68	132	279	4.71	10.94	78	92	217	27.4	114	0.95	33.5	3.96	23.26
张烈强	107	2	3251.04	757.1	88188.2	177799	335.5	235.38	223.15	1265.44	829750	1	2	1	47	1	173	64	153	263	4.95	7.7					110	0.92	29.9	3.56	21.38
苏达生	108	2	3220.97	921.61	64192.7	163647	248.36	369.67	123.27	2603.32	91181.9	1	1	1	60	1	170	59	137	155	4.27	8.58	37	216	3440	354	81	1.14	180	3.68	20.42
周炳顺	109	2	6676.08	3829.23	133969	129498	115.19	170.23	210.62	11397.4	988894	1	2	2	76	1	176	67	120	235	4.07	8.94	27	21	37	13	93	1.16	45	7.17	21.63
谢木添	110	2	2671.4	1779.79	143972	143241	456.16	373.99	215.76	438.85	1.67711e+06	2	1	2	59	2	151	42	125	545	4.37	12.87	27	208	2199.8	250.6	134	1.19	37.2	1.64	18.42
黄金希	113	2	3105.71	951.49	146336	172016	737	250.35	187.75	1729.78	1.34151e+06	2	2	2	60	1	163	61	141	328	3.91	14.36	37	31	182.6	20.7	90	0.98	41.4	4.77	22.96
王元信	114	2	5144.96	778.47	131232	252880	397.62	377.89	166.09	388.99	1.08889e+06	2	2	2	73	1	175	70	133	241	4.07	6.55	19	16	109.7	11.5	120	1.05	31.4	3.04	22.86
徐矩针	116	2	3634.07	455.55	180070	295885	1238.18	530.69	162.18	3843.27	919418	2	1	2	58	1	170	59	137	178	6.29	10.06	160	246	171.4	23.7	200	1.56	40.2	3.29	20.42
杨庆红	1108	2	2465.73	1180.8	148438	186140	873.68	325.44	191.98	1567.29	780256	1	2	1	40	1	165	65	138	289	6.42	8.18	36	316	2629.1	159.5	125	1.14	37.8	3.71	23.88
陈仁焕	118	2	4824.95	912.6	119152	176194	487.66	245.35	255.87	1041.79	954086	2	2	1	59	1	164	53	144	313	4.89	9.49	28	82	1230	87.2	88	1.07	42.3	3.4	19.71
廖瑞安	120	2	9422.83	741.89	163294	187743	439.35	469.04	123.27	1869.03	1.11595e+06	1	2	2	83	1	175	56	128	162	4.05	11.26	27	30	146.8	32.6	166	1.53	36.5	3.83	18.29
李少初	122	2	6112.28	1795.02	175024	174909	792.34	276.72	210.62		701018	2	2	2	76	1	176	61	101	206	2.55	5.59	37	226	3651	296	101	1.07	37.7	3.18	19.69
李连花	1101	2	5498.61	802.29	147728	197679	518.36	389.6	123.97	445.74	51587.6	1	2	2	46	2	158	60	100	327	4.13	7.33	18	15	77.5	11.7	61	1.04	34.1	2.65	24.03
冯玉笑	1114	2	3417.73	578.32	119545	163647	631.45	189.73	44.15	1104.5	135448	1	1	2	75	2	150	35	46	78	1.81	0.51	16	46	43.1	14.7	77	1.08	34.7	6.81	15.56
杨寿锦	1115	2		725.03	208261	131798	15.4	144.48	30.47	3423.66		1	1	1	55	1	170	70	138	163	5.39	9.62	13	16	189.9	14.4	134	1.38	37.6	5.98	24.22
梁德荣	1117	2	3714.94	484.52	124279	186140	309.25	228.34	95.91	803.42	441661	2	2	1	55	1	169	75	168	230	5.57	15.2	22	26	221.4	30.3	79	0.91	32.9	2.62	26.26
谢达华	1118	2	3358.52	760.39	104014	142915	381.3	166.59	120.74	1504.93	88907.8	1	2	2	44	1	168	75	4	10	13	18			139	0.89	32.4	4.61	1.16899e+200	0	26.57
曹灶新	1105	2	2800.23	749.29	74802.4	182613	278.25	244.52	66.33	1903.05	61753.7	1	1	2	44	1	156	65	151	130	4.75	4.4	25	16	88.6	18.4	60	1.03	37.7	2.53	26.71
何北权	1121	2	5448.78	1195.03	77425.8	176836	102.02	390.47	97.62	1694.68	99466.6	1	2	1	71	1	165	61	130	176	4.38	7.09	32	33			94	0.99	39.9	3.27	22.41
丁伟家	1122	2	3322.83	981.75	104291	118927	407.97	246.6	74.71	2339.99	282206	2	2	1	54	1	160	60	153	298	5.15	13.95	44	84	736	40.7	78	1.47	53	0.53	23.44
欧阳全标	1123	2	1372.49	670.28	41017.3	126534	287.38	313.94	100.43	3637.06	100242	2	2	1	68	1	160	55	115	384	3.74	13.39	36	19	188.8	18.3	71	0.94	34.6	3.93	21.48
高演明	1124	2	1717.93	562.22	114147	110597	97	245.35	50.32	2740.82	127282	1	2	1	74	1	164	60	144	375	4.63	15.42	86	386	5200	273.5	83	1.69	180	1.22	22.31
徐松光	1125	2	2671.4	479.14	110465	141938	93.99	98.63	43.22	2759.06	137641	1	2	1	66	1	170	78	145	289	4.92	8.39	62	75	154	19.3	93	0.96	42.8	5.92	26.99
刘镜河	1106	2	3435.43	463.82	153557	139328	764.15	324.16	104.14	726.48	247693	1	2	1	53	1	170	65	164	186	5.81	7.39	22	17	75.9	15.6	87	1.04	36	3.43	22.49
吴振春	1107	2	4913.26	445.19	137640	153956	97.5	223.79	80	2339.99	18349.1	1	2	1	46	1	162	68	178	218	5.65	10.12	35	28	139	17	78	1.18	48.8	4.46	25.91
植秀荣	1128	2	3886.72	624.95	125326	154280	87.51	258.28	63.98	3511.86	43813.9	2	1	1	70	1	166	63	171	142	5.41	9.4	41	33	1197.6	176.6	94	1.3		3.31	22.86
李骆松	1129	2	2009.92	488.24	69586.1	115270	108.59	174.28	94.84	1597.33	69228	1	2	2	68	2	155	50	127	384	4.15	12.55	43	209		181	69	1.01	28.2	3.54	20.81
毛旺照	1130	2	1573.3	340.09	34285.7	139328	105.05	159.33	71.9	1018.02	84693.5	1	2	1	49	1	168	87.5	126	230	5.8	9.29	31	31	4789.9	550.3	80	1.03		2.88	31
张镇泽	1131	2	4863.59	434.43	53734.3	163647	330.22	194.63	80.61	2603.32	146181	1	1	1	52	1	170	65	139	185	4.43	19.96	32	174	1852.1	103.4	108	1.01	34.8	3.05	22.49
吴艳英	1132	2			32690.2	301970	84		85.48			1	1	2	75	2	151	55	89	325	3.38	12.53	19	18	44.9	8.1	102	1.05	36.9	6.14	24.12
谢道民	1133	2			24284.3	221050	53.7		122.67			1	2	1	69	1	162	68	122	229	3.86	13.27		72	379.4	53.3	133	1.02	36.2	3.24	25.91
黎接	1135	2			21861.8	124622	188.23		110.18			1	2	2	65	2	155	68.5	119	245	3.99	7.4	29	24	151.7	10.7	56	0.88	33.3	3.37	28.51
潘国雄	1137	2			17006.7	177696	477.16		134.27			1	2	1	55	1	168	72	153	277	5.31	8.94	75	56	46	12.9	61	0.94	38.1	3.47	25.51
余文志	1139	2			14939.2	284501	30.03		146.79			2	2	1	63	1	170	71	135	265	4.08	5.12	32	22			92	0.89	39.7	3.49	24.57
梁淦奎	1143	2			15108.5	259135	188.23		145.31			1	2	1	56	1	165	68	146	212	5.54	7.04	50	27	1247.9	209.4	132	1.08	44.8	4.26	24.98
白继雄	1168	2			38505.4	241579	152.89		91.8			1	2	1	67	1	170	70	65	228	2.22	13.94	6	11	43.4	9.1	145	2.97	51.1	4.06	24.22
李焕好	1140	2			39448.5	176637	138.7		135.1			1	1	2	71	2	150	50	57	191	2.07	24.1	54	235	3551.6	52.6	164	6.71	83	3.18	22.22
陈柏	1149	2			15588.8	200549	67.28		72.41			1	1	1	70	1	170	70	73	68	2.79	14.6	1074	833	1426	36	119	1.11	46.8	2.27	24.22
邱伙秋	1150	2			16353.5	170683	63.84		126.71			1	2	1	58	1	170	71	170	279	5.92	7.51	19	18	130.5	11.3	104.3	0.94	38.6	3.47	24.57
阮茂纳	1151	2			22239.6	114712	75.38		148.7			2	2	1	63	1	165	53	142	246	4.86	7.62	19	15	77.2	13.3	81	0.97	38.4	2.43	19.47
陈光祥	1152	2			16410.2	208422	83.21		150.18			1	2	1	66	1	170	78.5	139	222	4.53	9	28	25	1384.6	122.4	93.1	1.16	163.8	3.2	27.16
黄映渠	1154	2			17291.3	147725	28.32		173.04			2	2	2	70	2	157	40	119	377	4.84	9.18	15	20	46.6	14	36	0.96	34.5	6.86	16.23
李勺威	1155	2			19579.8	212215	47.81		219.49			1	2	1	64	1	158	57	148	251	4.49	9.61	12	21	76.3	30	66	0.89	33.8	2.92	22.83
何灵彪	1156	2			13729	177696	86.37		130.37			1	2	1	52	1	161	65	167	250	5.43	12.69	24	29	342.7	19.5	99	1.03	147	4.63	25.08
邓连英	1142	2			16893	117978	74.6		204.66			1	2	2	66	2	141	51	88	213	2.8	9.59	20	20	48.2	7.3	67.7	1.12	47.9	2.39	25.65
张毅	1158	2			21687.7	151677	38.08		148.7			1	2	1	47	1	165	83	171	217	5.6	7.59	46	23	139.4	11	90	0.95	39	3.11	30.49
徐杰明	1159	2			20472.6	258307	24.59		134			1	2	1	65	1	155	56	136	190	4.39	14.32	11	12	139.4	11.4	58	1.11	38.2	2.81	23.31
李映元	1109	2			49552.3	232009	45.99		127.73			1	2	1	46	1	168	72	132	243	6.4	4.96	24	27	51	56	77	1.55	41.8	2.34	25.51
林屏	1163	2			13897.5	222990	28.32		235.7			1	1	2	63	2	152	59	125	276	4.47	7.71	22	21	63.4	9.9	62.4	1.08	33.5	3.7	25.54
谭雪勤	1164	2			13869.5	348525	59.31		186.56			1	2	2	63	2	157	55	122	229	4.2	6.46	19	22	117.4	12.6	53	0.94	38	3.4	22.31
黄建辉	1165	2			13364.2	155002	32.11		192.07			1	2	1	45	1	170	65	134	199	4.48	7.79	31	21	122.9	12.2	72	1.01	38.4	4.85	22.49
郑勉佳	1166	2			8385.2	218345	42.73		173.48			1	1	1	63	1	170	70	154	199	5.11	8.36	62	44	95.7	16.4	96	1.02	39.1	3.36	24.22
欧培南	1172	2			14431.9	235578	43.81		162.03			1	2	1	60	1	158	54	126	4	126	12.19	24	62	444.6	43.4	79.9	0.95	38.4	4.35	21.63
甘国静	1173	2			24519.2	202038	68.04		214.9			2	2	1	58	1	165	50	133	208	3.99	9.86	24	20	256.6	60.2	81	0.98	39	2.4	18.37
梁惜如	1174	2			12971.9	156006	318.92		197.16			2	1	2	54	2	158	60	124	192	4.7	9.14	11	17	134.3	16.4	56.2	0.81	34.7	4.24	24.03
杨润笑	1175	2			18805	181960	58.93		232.72			1	2	2	64	2	158	55	133	252	4.51	6.77	13	16	78.3	10.7	52.3	0.87	32.6	2.7	22.03
马惠如	1176	2			15447.4	241982	34.9		188.39			1	1	2	58	2	161	59	123	350	4.09	7.42	26	21	94.2	11.6	69	0.89	34.7	3.4	22.76
黎煜桃	1181	2			19263.8	233196	81.63		160.5			1	2	1	62	1	158	60	160	249	5.12	10.78	22	23	2173	136.1	124	0.87	38.3	4.17	24.03
李明凡	1182	2			10962.5	313564	53.7		180.88			1	2	1	51	1	168	56	134	239	4.38	9.56	18	42	177	25	74	0.98	35.6	6.85	19.84
金平清	1184	2			12803.9	286228	52.22		180.66			1	2	1	54	1	171	60	136	158	4.26	8.11		17	84.8	13	64.7	1.11	41.5	4.72	20.52
麦荣培	1187	2			38630.9	362764	252.57		142.79			1	1	1	49	1	168	65	118	337	4.13	8.54	35	28	237	19.8	72	1.05	38.9	6.25	23.03
王志银	1190	2			13252	107142	190.48		272.72			2	2	2	51	1	170	71	151	253	5.14	8	29	12	92.1	17.7	84.6	0.98	36.1	3.73	24.57
梁石坤	1191	2			16552.1	293180	240.26		177.51			2	2	1	49	1	160	57.5	151	184	4.99	7.67	22	24	74.5	10.1	59.5	1.02	44.2	3.24	22.46
向龙	1192	2			24930.8	222213	148.14		246.52			2	2	1	52	1	170	75	168	278	5.59	11.25	22	17	192	12	68	1	35.4	3.11	25.95
刘土华	1193	2			17120.5	148053	158.55		226.31			1	2	1	38	1	167	76	120	227	4.95	10.11	72	23	61.1	18.1	87	0.85	30.9	3.31	27.25
林少秋	1194	2			15758.5	233196	182.85		97.65			2	1	1	53	1	183	80	163	237	5.35	7.15	36	22	52.9	16.7	64.2	0.84	32.4	3.7	23.89
陈贯宏	1195	2			17433.7	240776	93.15		210.36			1	2	2	54	1	168	54	131	156	4.29	4.89	14	16	93.2	22.2	78	1	42.5	2.33	19.13
梁大军	1198	2			5712.86	335922	403.21		172.37			2	2	1	44	1	170	70	110	80	3.68	3.82	102	47	597.5	84.3	91.9	2.6	48.5	3.85	24.22
莫同南	1199	2			14488.2	212596	126.42		205.14			1	2	1	58	1	179	80	165	219	5.71	16.29	39	411	3704.3	338.2	94				24.97
梁旭明	11102	2			23434.9	152339	189.58		200.43			2	2	2	53	1	165	68	130	264	4.54	12.82	17	110	1324	100.1	75.6	1.07	37.8	2.84	24.98
		1=AAD group,2=control group										1=HP +,2=HP -	1=DM+,2+DM-	1=SMOKE+,2=SMOKE-		1=MALE,2=FEMALE
